# Supplementary material
Source: publisher site journal article supplement (https://www.spandidos-publications.com/7991/downloadSupplementary)
Supplement: Supplementary file 1 [file downloadSupplementary]

## Sheet: Table S2
Table SII. Sequences of the primers used in the present study.
Gene	Forward primer (5’-3’)	Reverse primer (5’-3’)	Assay
LDHB	TGGTATGGCGTGTGCTATCAG	TTGGCGGTCACAGAATAATCTTT	RT-qPCR
b-catenin	AAAGCGGCTGTTAGTCACTGG	CGAGTCATTGCATACTGTCCAT	RT-qPCR
AARS1	TAACGGCTCTCCAGACCTGA	TCTACAGACGCCAAAGGCTG	RT-qPCR
AARS2	GTTCAAGCCAATCTTTCTGGGC	CAGGTCGTTATGGTGTCCTCC	RT-qPCR
CBP	CAACCCCAAAAGAGCCAAACT	CCTCGTAGAAGCTCCGACAGT	RT-qPCR
KAT5	GGGGAGATAATCGAGGGCTG	TCCAGACGTTTGTTGAAGTCAAT	RT-qPCR
KAT8	GTCACGGTGGAGATCGGAGA	CCCTCCTGGTCGTTCACTC	RT-qPCR
P300	AGCCAAGCGGCCTAAACTC	TCACCACCATTGGTTAGTCCC	RT-qPCR
SIRT1	TAGCCTTGTCAGATAAGGAAGGA	ACAGCTTCACAGTCAACTTTGT	RT-qPCR
SIRT2	TGCGGAACTTATTCTCCCAGA	GAGAGCGAAAGTCGGGGAT	RT-qPCR
SIRT3	ACCCAGTGGCATTCCAGAC	GGCTTGGGGTTGTGAAAGAAG	RT-qPCR
HDAC1	CCGCATGACTCATAATTTGCTG	ATTGGCTTTGTGAGGGCGATA	RT-qPCR
HDAC2	ATGGCGTACAGTCAAGGAGG	TGCGGATTCTATGAGGCTTCA	RT-qPCR
HDAC3	CCTGGCATTGACCCATAGCC	CTCTTGGTGAAGCCTTGCATA	RT-qPCR
NEAT1	GTGGCTGTTGGAGTCGGTAT	TAACAAACCACGGTCCATGA	RT-qPCR
GAPDH	GGAGCGAGATCCCTCCAAAAT	GGCTGTTGTCATACTTCTCATGG	RT-qPCR
b-catenin promoter	CCTAGTGACAAGTGGAACCAGA	GAACTCTCCGTAGAACGGGC	ChIP-PCR
RT-qPCR, reverse transcription-quantitative polymerase chain reaction; ChIP, chromatin immunoprecipitation; NEAT1, nuclear paraspeckle assembly transcript 1; LDHB, lactate dehydrogenase B; AARS, alany-tRNA synthetase; CBP, CREB binding lysine acetyltransferase; KAT, lysine acetyltransferase; SIRT, sirtuin; HDAC, histone deacetylase.
